# Supplementary material for: Variants of the elongator protein 3 (ELP3) gene are associated with motor neuron degeneration
Source: PubMed Central journal article supplement — Hum Mol Genet. 2008 Nov 7;18(3):472–81. doi: 10.1093/hmg/ddn375 (PMC2638803; doi:10.1093/hmg/ddn375), 2008-11-07
Supplement: ddn375_1.pdf [file ddn375_1.pdf]

**SUPPLEMENTARY MATERIAL****Variants of the *elongator protein 3 (ELP3)* gene are associated with motor neuron degeneration**

Claire L Simpson<sup>1</sup>, Robin Lemmens<sup>2,3</sup>, Katarzyna Miskiewicz<sup>4,5</sup>, Wendy J Broom<sup>6</sup>, Valerie K Hansen<sup>1</sup>, Paul WJ van Vught<sup>7</sup>, John E Landers<sup>6</sup>, Peter Sapp<sup>6,8</sup>, Ludo Van Den Bosch<sup>2,3</sup>, Joanne Knight<sup>9</sup>, Benjamin M Neale<sup>9</sup>, Martin R Turner<sup>1</sup>, Jan H Veldink<sup>7</sup>, Roel A Ophoff<sup>10,11</sup>, Vineeta B Tripathi<sup>1</sup>, Ana Beleza<sup>1</sup>, Meera N Shah<sup>1</sup>, Petroula Proitsi<sup>12</sup>, Annelies Van Hoecke<sup>2,3</sup>, Peter Carmeliet<sup>3,13</sup>, H Robert Horvitz<sup>8</sup>, P Nigel Leigh<sup>1</sup>, Christopher E Shaw<sup>1</sup>, Leonard H van den Berg<sup>7</sup>, Pak C Sham<sup>14</sup>, John F Powell<sup>12</sup>, Patrik Verstreken<sup>4,5</sup>, Robert H Brown Jr<sup>6</sup>, Wim Robberecht<sup>2,3</sup>, Ammar Al-Chalabi<sup>1\*</sup>.

1. MRC Centre for Neurodegeneration Research, King's College London, Institute of Psychiatry, Department of Neurology, London SE5 8AF, UK

2. Service of Neurology (University Hospital Leuven) and Laboratory for Neurobiology, Section of Experimental Neurology, University of Leuven, Leuven, B-3000, Belgium

3. Vesalius Research Center, Flanders Institute for Biotechnology (VIB), Leuven, B-3000, Belgium

4. VIB, Department of Molecular and Developmental Genetics, Leuven, B-3000, Belgium

5. KULeuven, Center for Human Genetics, Laboratory of Neuronal Communication, Leuven, B-3000, Belgium

6. Cecil B Day Laboratory for Neuromuscular Research, Massachusetts General Hospital East, Charlestown, MA, USA

7. Department of Neurology, Rudolf Magnus Institute of Neuroscience, University Medical Center Utrecht, Netherlands
8. Howard Hughes Medical Institute, Department of Biology, Massachusetts Institute of Technology, Cambridge, MA, USA
9. MRC Social, Genetic and Developmental Psychiatry Centre, King's College London, Institute of Psychiatry, London SE5 8AF, UK
10. Department of Medical Genetics and Rudolf Magnus Institute of Neuroscience, University Medical Center, Utrecht, Netherlands
11. Neuropsychiatric Institute, University of California, Los Angeles, USA
12. MRC Centre for Neurodegeneration Research, King's College London, Institute of Psychiatry, Department of Neuroscience, London SE5 8AF, UK
13. Vesalius Research Center, KU Leuven, Leuven, B-3000, Belgium
14. Department of Psychiatry and Genome Centre, University of Hong Kong, Hong Kong

\*Address for correspondence:

MRC Centre for Neurodegeneration Research, King's College London, Institute of Psychiatry P 043, London, SE5 8AF, UK

Email: [ammar@iop.kcl.ac.uk](mailto:ammar@iop.kcl.ac.uk)

Telephone: +44 20 7848 5172, Fax: +44 20 7848 5190

The authors wish it to be known that, in their opinion, the first 2 authors should be regarded as joint First Authors

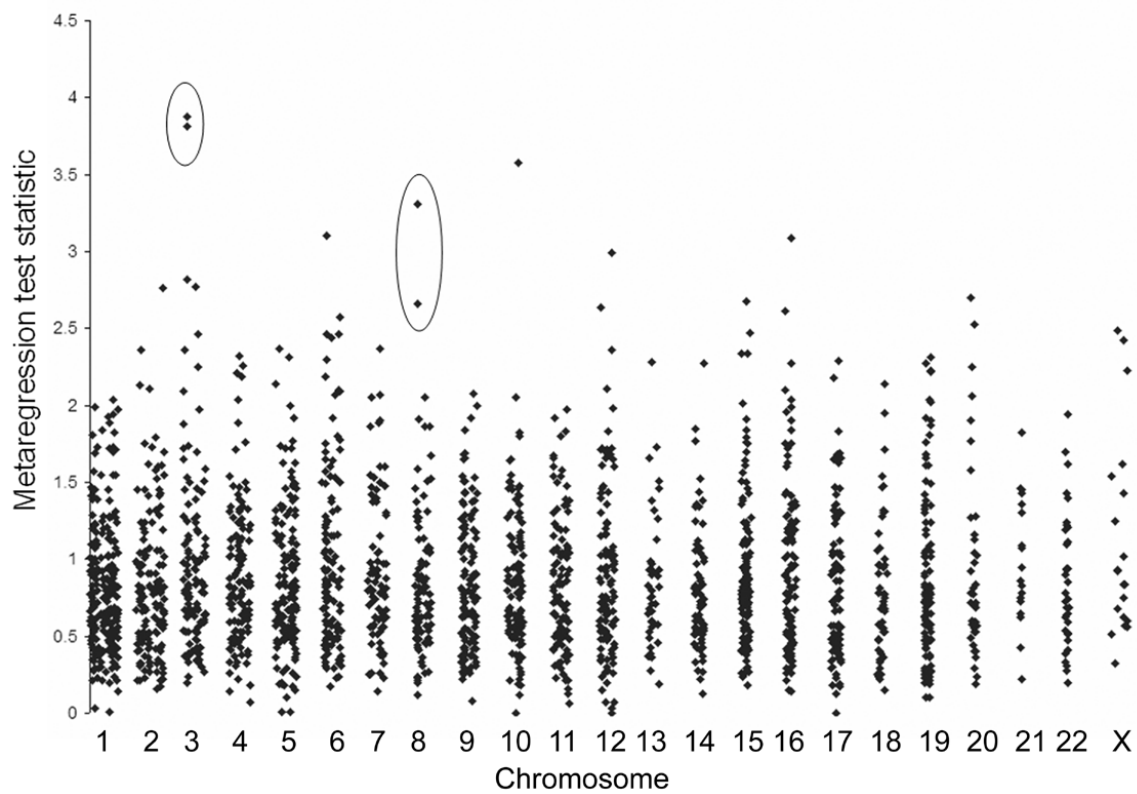

**Figure S1. Results of analysis of microsatellite markers for association in UK population.**

The four markers followed up by individual genotyping are circled. Both pairs were about 1Mb apart with at least one of the pair in the top four markers.

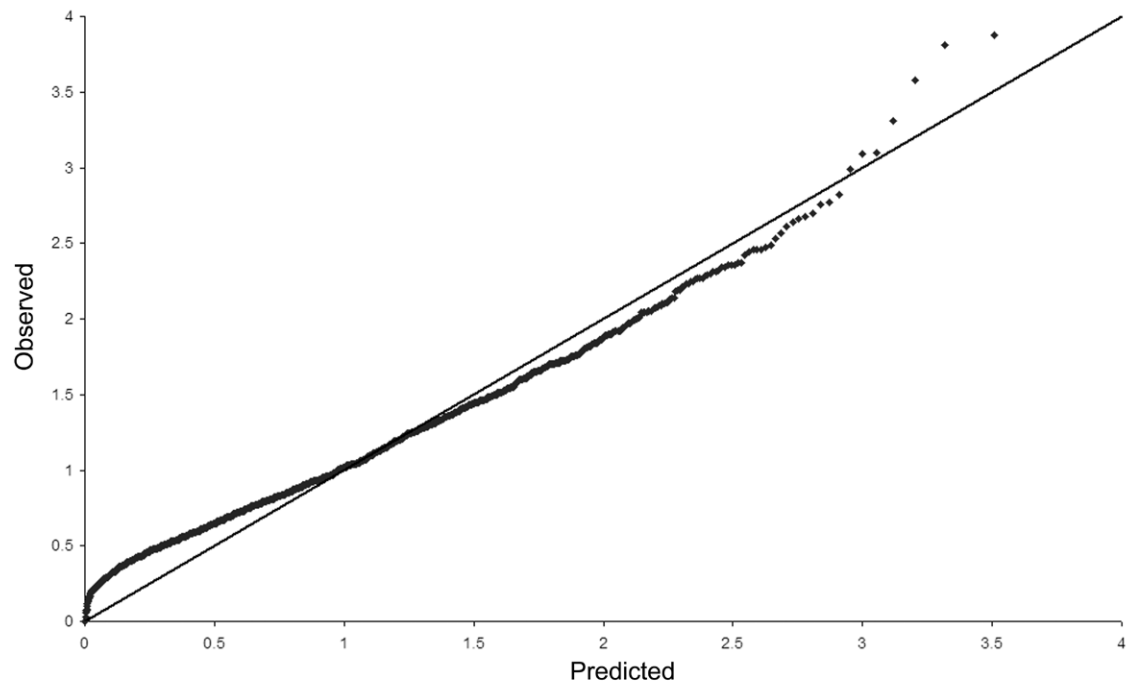

**Figure S2. A Q-Q plot of the metaregression results for 1,884 microsatellite markers.**

Because allele frequencies were estimated from DNA pools, the test statistic has been deflated by variance estimates of the stutter artifact, differential amplification artifact, and sampling error for each marker.

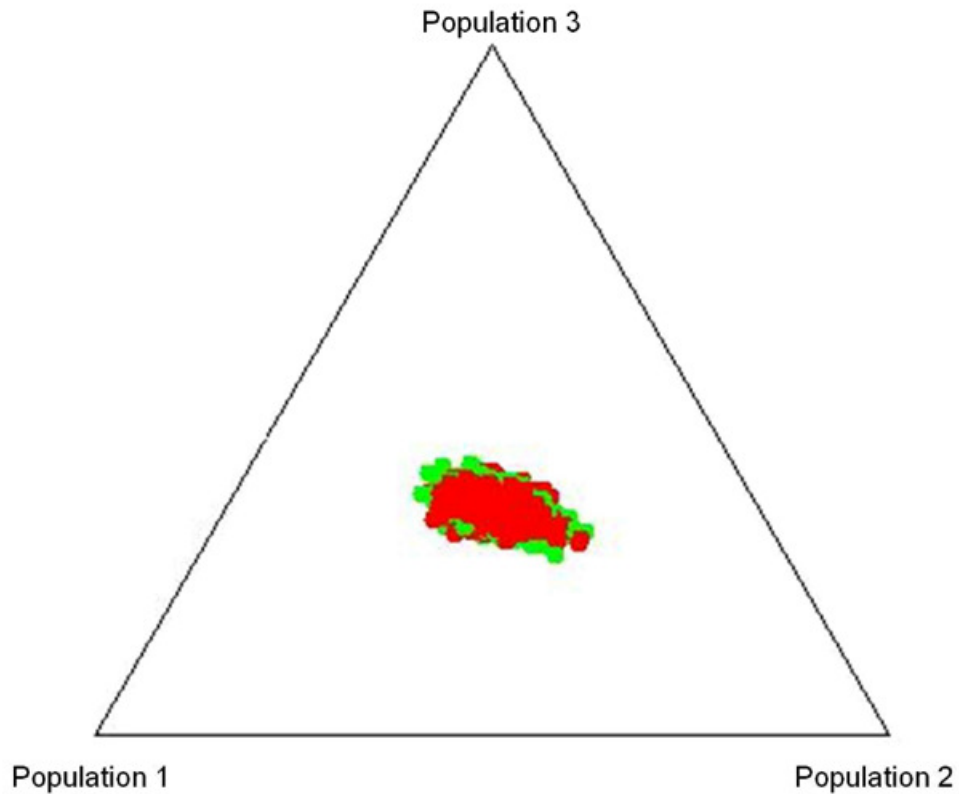

**Figure S3. A triangle plot of the genetic distance for each individual from each of three putative ancestral populations ( $K = 3$ ) estimated with the program Structure.** Cases are shown in red and controls in green. The central grouping of plotted points suggests that the three populations are genetically similar. (Also see Figure S4).

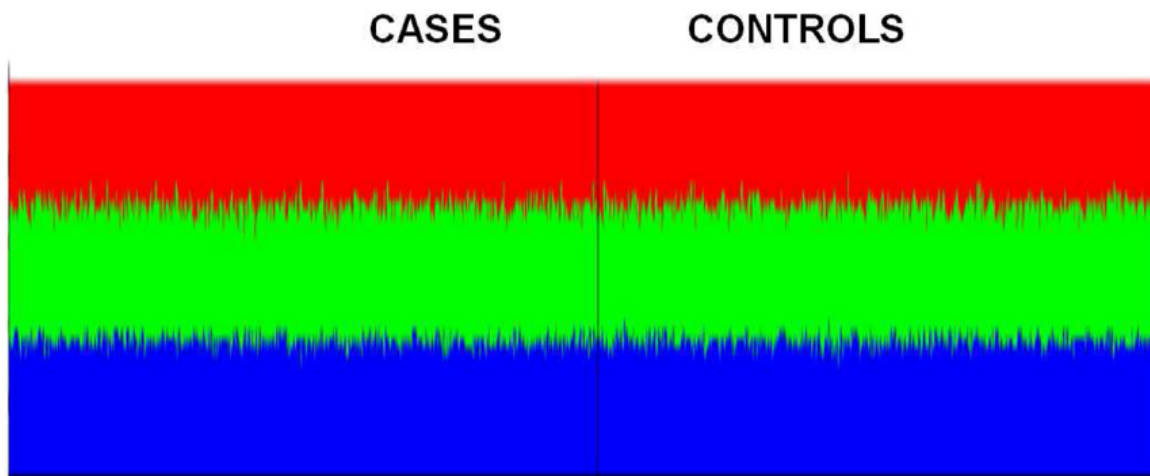

**Figure S4. A bar plot of the inferred ancestry (Q) for each individual assuming three ancestral populations ( $K = 3$ ) estimated with the program Structure.**

The populations were genetically similar based on the  $\chi^2$  sum statistic for the 99 genomic control SNPs ( $P = 0.57$ ) or analysis with the program Structure (43). In addition, assuming a single population, Wright's coefficient(44),  $F_{ST}$ , was well below the range for intracontinental populations at 0.0022. In this figure, each individual is plotted as a single vertical line partitioned into K colored segments representing that individual's estimated membership fraction in each of the K inferred clusters. The left of the plot shows cases and the right controls. All individuals are admixed with roughly a third ( $1/K$ ) inferred ancestry from each putative population. This suggests there is no strong population structure. (Also see Figure S3).

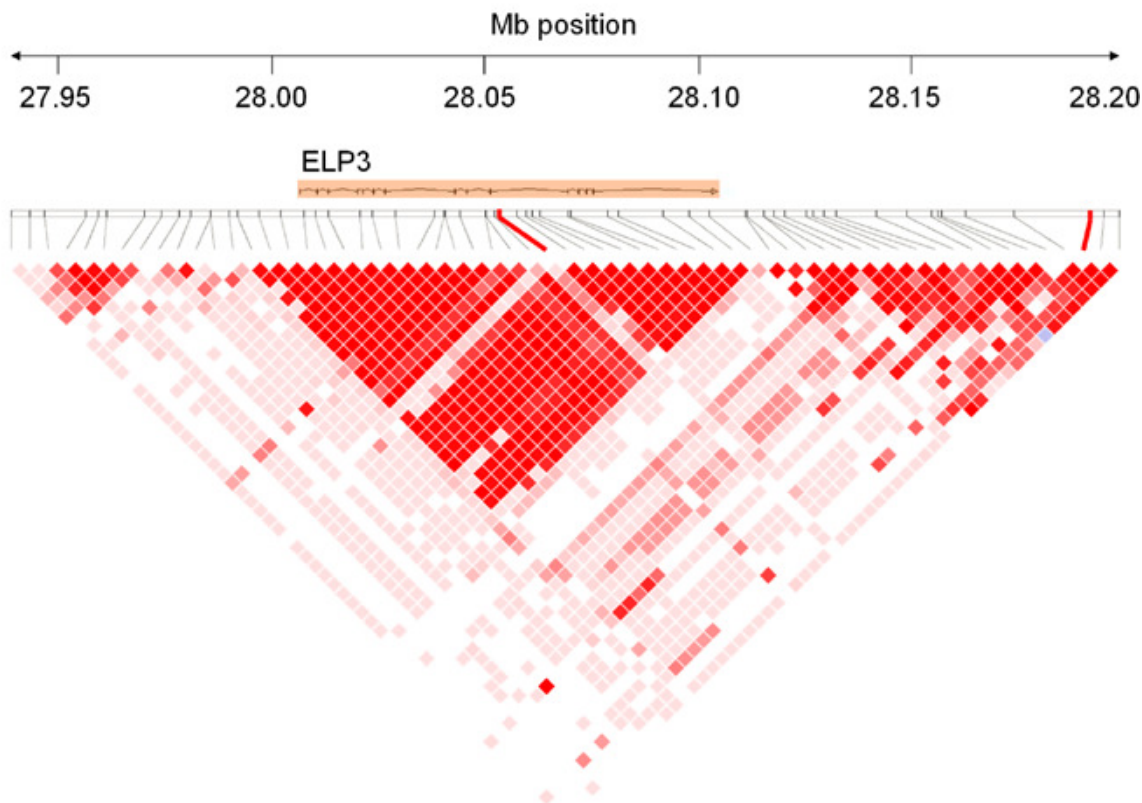

**Figure S5. A linkage disequilibrium map of the *ELP3* region.**

The genetic map in the region of *ELP3* has been plotted with the relative positions of *ELP3* shown in the center and genotyped markers shown as vertical lines descending to the triangle plot below. The position of marker D8S1820 is shown in red at 28.05 Mb. The shaded triangular region shows the  $D'$  values for LD for any pair of markers, with red being high values of  $D'$ , shaded to white low values. For D8S1820 the commonest allele, 5, is shown as only one allele can be plotted on such graphs. The same map with allele 6 is provided in Figure S6 and a scatterplot to show all alleles is provided in Figure 1. Alleles of D8S1820 and rs12682496 (shown in red near 28.20 Mb) form a haplotype associated with a reduced risk of ALS.

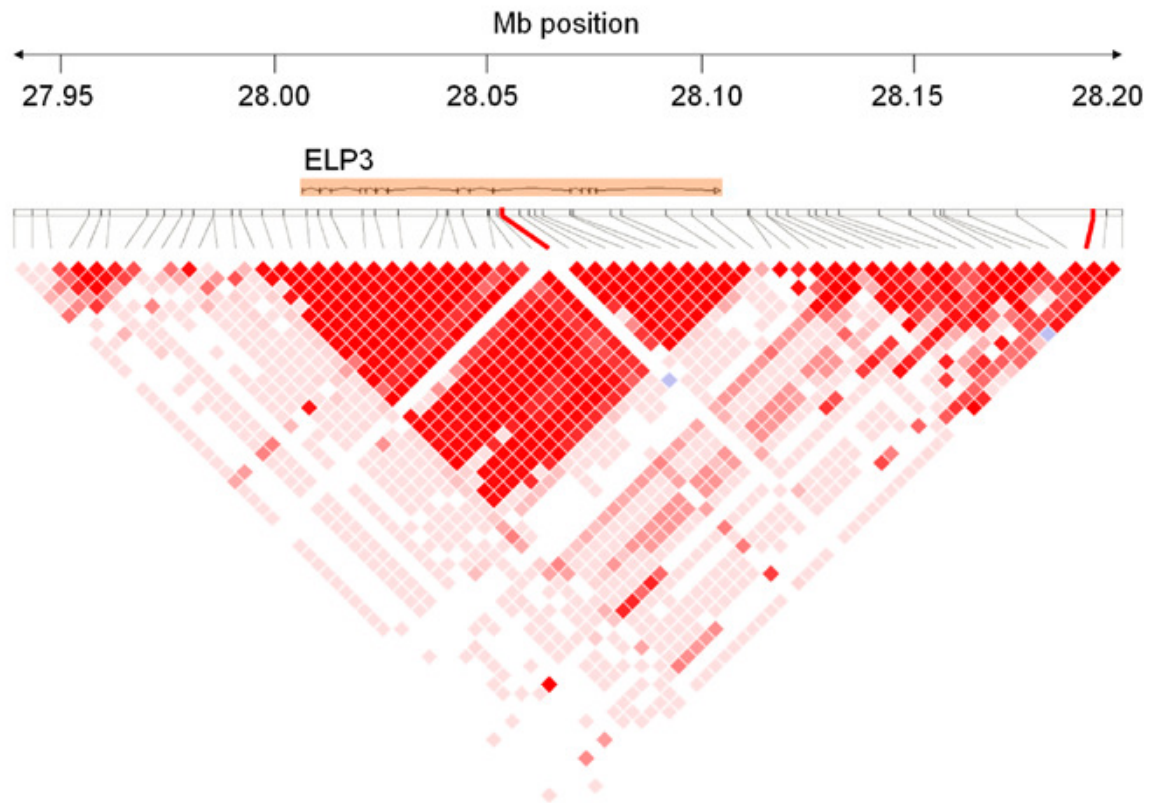

**Figure S6. A linkage disequilibrium map of the *ELP3* region.**

This figure is the same as Figure S5 except that allele 6 of D8S1820 is shown.



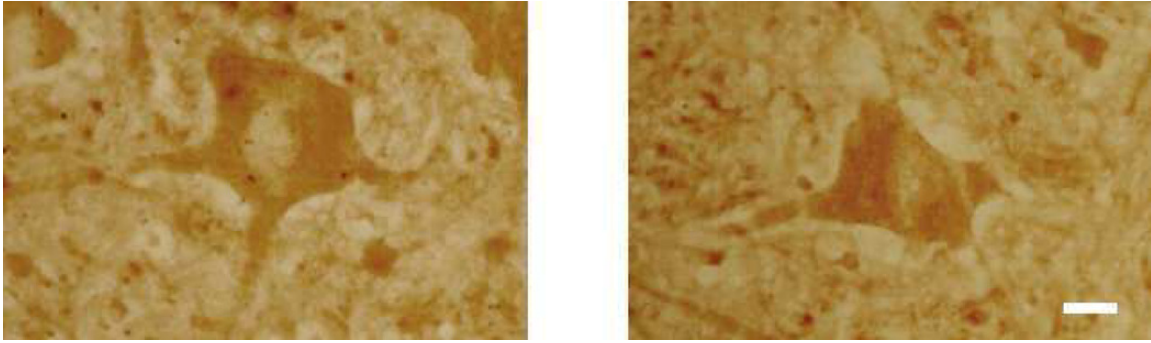

**Figure S7. ELP3 expression in motor neurons of human spinal cord.**

Paraffin sections of control human lumbar spinal cord stained for ELP3. The motor neuron in the center of each image stains brown confirming that ELP3 was present in motor neurons in the lumbar spinal cord. Scale bar 20  $\mu\text{m}$ .

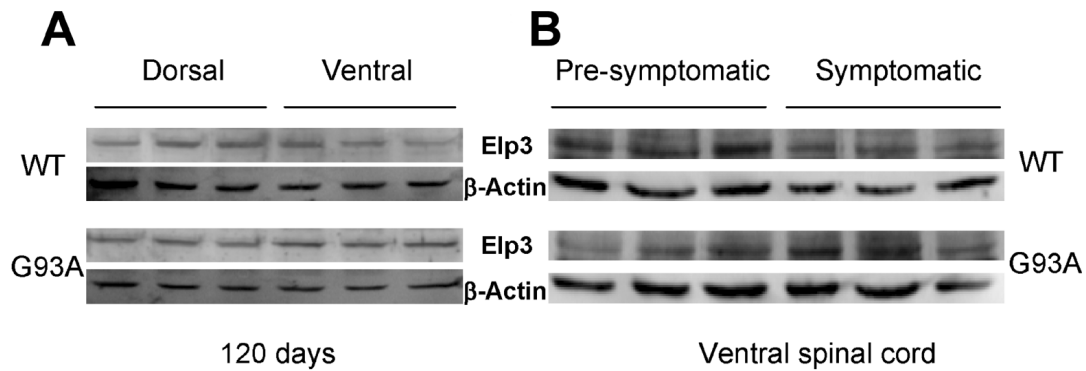

**Figure S8. ELP3 expression in spinal cords of transgenic *SOD1*<sup>G93A</sup> and *SOD1*<sup>WT</sup> mice.**

(A) ELP3 was present in ventral as well as dorsal spinal cord of *SOD1*<sup>G93A</sup> and *SOD1*<sup>WT</sup> mice at 120 days. There was no difference between dorsal and ventral spinal cords or between WT and G93A mice.

(B) In the ventral horn of G93A mice, ELP3 expression did not change after onset of disease: 60-80 days (pre-symptomatic) versus 120 days (symptomatic). Expression in WT mice at the equivalent ages is given for comparison (WT mice remain asymptomatic but the same labels have been used for ease of reference).

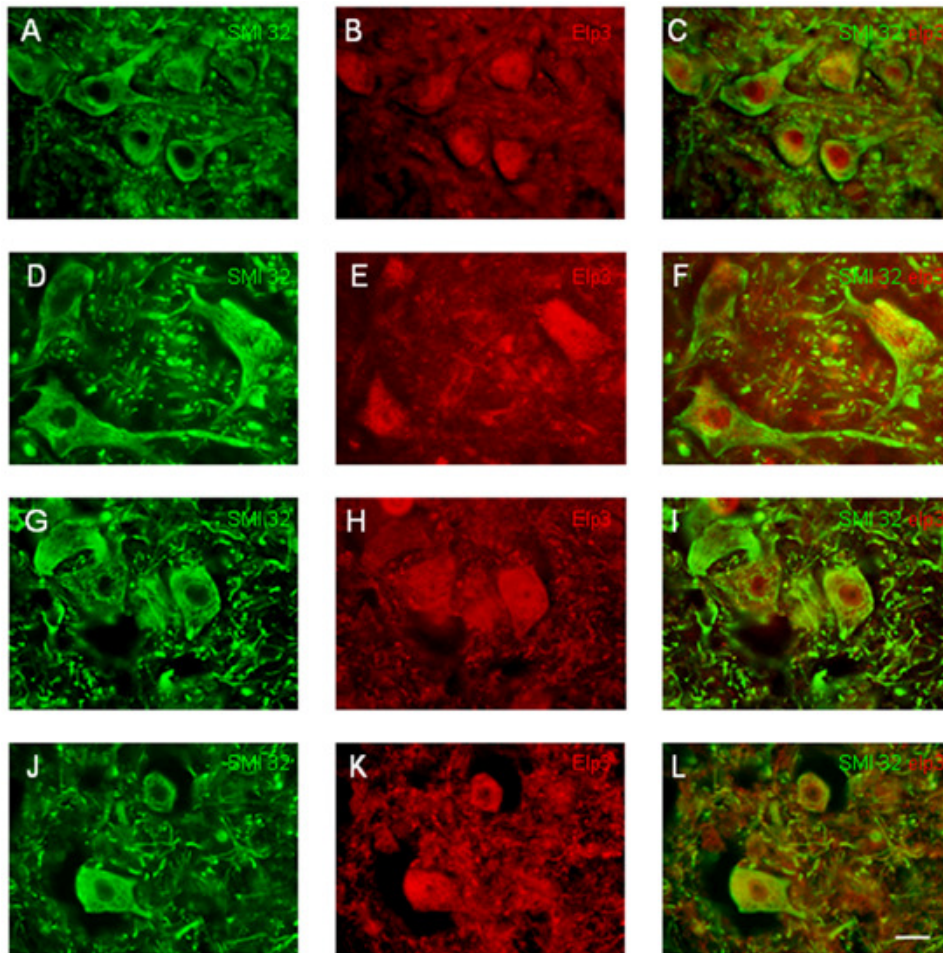

**Figure S9. *ELP3* expression in motor neurons of spinal cords of transgenic *SOD1*<sup>G93A</sup> and *SOD1*<sup>WT</sup> mice demonstrated by immunostaining.**

Fresh frozen spinal cord of *SOD*<sup>WT</sup> mice (A)-(F) and *SOD*<sup>G93A</sup> (G)-(L) were sectioned at presymptomatic (WT: (A)-(C) and G93A: (G)-(I)) and symptomatic (WT: (D)-(F) and G93A: (J)-(L)) ages. To identify motor neurons, sections were double stained with SMI32 antibody, which labels nonphosphorylated epitopes on medium and heavy subunits of neurofilament proteins (shown in green, (A), (D), (G) and (J)).

Immunostaining for *ELP3* showed *ELP3* was present in motor neurons at different ages and in both transgenic animal stains (shown in red, (B), (E), (H) and (K)). Overlays are shown in panels (C), (F), (I) and (L). Scale bar 20  $\mu$ m.

**Table S1. Demographic characteristics of the samples studied.**

Table showing the mean, standard deviation and range of age of onset of ALS in years as defined by first symptoms of weakness. For controls, age at sample donation was used.

|                       | <i>UK</i>    |                 | <i>USA</i>   |                 | <i>Belgium</i> |                 |
|-----------------------|--------------|-----------------|--------------|-----------------|----------------|-----------------|
|                       | <b>Cases</b> | <b>Controls</b> | <b>Cases</b> | <b>Controls</b> | <b>Cases</b>   | <b>Controls</b> |
| Mean age of onset     | 56.4         | 56.4            | 53.78        | 56.6            | 57.3           | 40.2            |
| Range                 | 26.4-80.9    | 26.1-80.0       | 18.0-88.0    | 23.7-95.2       | 18.0-84.0      | 0.0-97.0        |
| Standard deviation    | 12.5         | 12.5            | 13.5         | 14.1            | 12.5           | 18.4            |
| Percentage male       | 59.7         | 59.7            | 64.6         | 35.9            | 62.4           | 44.2            |
| Number of individuals | 287          | 290             | 304          | 202             | 190            | 210             |

**Table S2. Genetic association results for prioritized microsatellite markers.**

Four markers were selected for initial follow-up. Although there were suggestive results for three of the markers in the overall analysis, only D8S1820 showed replicated association in all three populations.

|         | Rank | Conventional genotyping, permuted <i>P</i> -values <sup>a</sup> |             |                       | Total                 |
|---------|------|-----------------------------------------------------------------|-------------|-----------------------|-----------------------|
|         |      | Pools                                                           | Individuals | Individuals           |                       |
| Marker  | UK   | UK                                                              | USA         | Belgium               |                       |
| D3S1298 | 1    | 0.004                                                           | 0.20        | 0.009                 | $5 \times 10^{-4}$    |
| D3S1260 | 2    | 0.003                                                           | 0.83        | 0.61                  | 0.048                 |
| D8S1048 | 4    | $2.20 \times 10^{-5}$                                           | 0.46        | 0.04                  | $5.02 \times 10^{-5}$ |
| D8S1820 | 12   | $9.00 \times 10^{-4}$                                           | 0.0023      | $2.60 \times 10^{-6}$ | $1.96 \times 10^{-9}$ |

<sup>a</sup>*P*-values were calculated by up to 10,000,000 permutations using all 15 alleles in the program CLUMP. <sup>b</sup>For the stratified test, *P*-values were combined with Fisher's method.

**Table S3. Counts and frequencies for ELP3 alleles in cases and controls.**

There are eight common and seven rare alleles of the D8S1820 microsatellite in intron 10 of *ELP3*. Allele 13 was assumed to exist based on repeat structure, although no individuals carrying it were identified. The classification into protection-associated or risk-associated alleles was carried out by CLUMP.

| <b>Allele</b> | <b>Size bp</b> | <b>Count cases</b> | <b>Count controls</b> | <b>Frequency cases</b> | <b>Frequency controls</b> | <b>Risk- or protection-associated</b> |
|---------------|----------------|--------------------|-----------------------|------------------------|---------------------------|---------------------------------------|
| 1             | 90             | 0                  | 2                     | 0                      | 0.001                     | protection-associated                 |
| 2             | 92             | 3                  | 0                     | 0.002                  | 0                         | risk-associated                       |
| 3             | 94             | 2                  | 1                     | 0.001                  | 0.001                     | risk-associated                       |
| 4             | 96             | 26                 | 18                    | 0.017                  | 0.013                     | risk-associated                       |
| 5             | 98             | 458                | 387                   | 0.294                  | 0.276                     | risk-associated                       |
| 6             | 100            | 42                 | 80                    | 0.027                  | 0.057                     | protection-associated                 |
| 7             | 102            | 11                 | 10                    | 0.007                  | 0.007                     | risk-associated                       |
| 8             | 104            | 391                | 358                   | 0.25                   | 0.255                     | risk-associated                       |
| 9             | 106            | 527                | 426                   | 0.337                  | 0.303                     | risk-associated                       |
| 10            | 108            | 51                 | 75                    | 0.033                  | 0.053                     | protection-associated                 |
| 11            | 110            | 48                 | 38                    | 0.031                  | 0.027                     | risk-associated                       |
| 12            | 112            | 3                  | 3                     | 0.002                  | 0.002                     | risk-associated                       |
| 13            | 114            | 0                  | 0                     | 0                      | 0                         |                                       |
| 14            | 116            | 0                  | 2                     | 0                      | 0.001                     | protection-associated                 |
| 15            | 118            | 0                  | 4                     | 0                      | 0.003                     | protection-associated                 |
| <b>TOTAL</b>  |                | 1562               | 1404                  |                        |                           |                                       |

**Table S4. Markers typed in and around the *ELP3* gene.**

Table showing results of tests for association between SNP markers around *ELP3* and ALS. These results are consistent with those from genome-wide association studies and are probably a result of the poor LD between the most strongly associated alleles of D8S1820 and nearby SNPs.

| Number | Marker name | Base pair position | $\chi^2$ P-value <sup>a</sup> |
|--------|-------------|--------------------|-------------------------------|
| 1      | rs7815173   | 27939020           | 0.6158                        |
| 2      | rs4732803   | 27943494           | 0.4817                        |
| 3      | rs1377336   | 27946777           | 0.2671                        |
| 4      | rs11780888  | 27956629           | 0.3842                        |
| 5      | rs11136028  | 27959504           | 0.7257                        |
| 6      | rs1000658   | 27961518           | 0.195                         |
| 7      | rs12681850  | 27970396           | 0.411                         |
| 8      | rs12549429  | 27974287           | 0.1133                        |
| 9      | rs2045029   | 27978493           | 0.9692                        |
| 10     | rs4732620   | 27981123           | 0.5852                        |
| 11     | rs13271784  | 27985846           | 0.4497                        |
| 12     | rs9644136   | 27985898           | 0.2807                        |
| 13     | rs1901744   | 27990118           | 0.9521                        |
| 14     | rs4732815   | 27992167           | 0.2648                        |
| 15     | rs17487788  | 27997263           | 0.4932                        |
| 16     | rs1377338   | 28002292           | 0.3665                        |

|                 |                  |                 |                       |
|-----------------|------------------|-----------------|-----------------------|
| 17              | rs2167768        | 28007635        | 0.8796                |
| 18              | rs1563055        | 28010384        | 0.3893                |
| 19              | rs2290369        | 28013475        | 0.909                 |
| 20              | rs6996985        | 28020775        | 0.852                 |
| 21              | rs3213997        | 28023775        | 0.6597                |
| 22              | rs4732823        | 28029134        | 0.9107                |
| 23              | rs11136032       | 28038235        | 0.9763                |
| 24              | rs1530929        | 28040396        | 0.8162                |
| 25              | rs1000275        | 28040848        | 0.2805                |
| 26              | rs7812540        | 28044231        | 0.8529                |
| 27              | rs4732828        | 28050160        | 0.7604                |
| 28              | rs4732628        | 28050420        | 0.7276                |
| 29              | rs3757895        | 28052285        | 0.6284                |
| 30              | D8S1820          | 28053522        | $1.96 \times 10^{-9}$ |
| 31              | rs10104739       | 28057599        | 0.9936                |
| 32              | rs7003418        | 28059693        | 0.8559                |
| 33              | rs10095097       | 28061229        | 0.8826                |
| 34              | rs10216910       | 28062983        | 0.6333                |
| 35 <sup>b</sup> | <i>rs9644138</i> | <i>28066473</i> | <i>0.8965</i>         |
| 36              | rs4732832        | 28069498        | 0.9926                |
| 37              | rs2322899        | 28070295        | 0.9886                |
| 38              | rs2015443        | 28078845        | 0.7387                |
| 39              | rs351761         | 28081444        | 0.9312                |



|    |            |          |         |
|----|------------|----------|---------|
| 40 | rs1350801  | 28091897 | 0.915   |
| 41 | rs6558044  | 28098029 | 0.8461  |
| 42 | rs7833735  | 28102730 | 0.9763  |
| 43 | rs13268953 | 28111155 | 0.02857 |
| 44 | rs4732631  | 28111472 | 0.4645  |
| 45 | rs4054817  | 28115460 | 0.9644  |
| 46 | rs4319045  | 28115564 | 0.7425  |
| 47 | rs13253111 | 28117893 | 0.944   |
| 48 | rs12675992 | 28120336 | 0.274   |
| 49 | rs12544946 | 28125347 | 0.6575  |
| 50 | rs6986290  | 28127038 | 0.4625  |
| 51 | rs17411951 | 28129563 | 0.5138  |
| 52 | rs6985192  | 28132341 | 0.2856  |
| 53 | rs10094977 | 28141727 | 0.2256  |
| 54 | rs6558049  | 28148960 | 0.4286  |
| 55 | rs6987991  | 28154703 | 0.8748  |
| 56 | rs13277389 | 28156153 | 0.5208  |
| 57 | rs13254276 | 28157158 | 0.8974  |
| 58 | rs2614114  | 28162703 | 0.4136  |
| 59 | rs2100814  | 28174049 | 0.7637  |
| 60 | rs12682496 | 28192028 | 0.3375  |
| 61 | rs1461223  | 28195157 | 0.8744  |
| 62 | rs2614048  | 28198702 | 0.3999  |

<sup>a</sup>*P*-values are for a Mantel-Haenzsel  $\chi^2$  test for association with ALS except in the case of D8S1820 where the Fisher method for combining *p*-values was used to combine permutation-based *P*-values derived from the program CLUMP. <sup>b</sup>Alleles of marker 35 were not in Hardy-Weinberg equilibrium.

**Table S5. Elements of the RNA processing pathway implicated in neurodegeneration.**

Table showing some of the proteins linked, associated or pathologically implicated in neurodegeneration. Proteins from the RNA processing pathway appear to be particularly important for motor neurons.

| RNA process                  | Protein       | MIM    | Complex/function           | <sup>b</sup> Human disease | Reference |
|------------------------------|---------------|--------|----------------------------|----------------------------|-----------|
| <b>Initiation</b>            |               |        |                            |                            |           |
| ? pre-mRNA                   | SETX          | 608465 | DNA/RNA helicase           | ALS4                       | (24)      |
| ? pre-mRNA                   | IGHMBP2       | 600502 | DNA/RNA helicase           | SMARD/HMN6                 | (45)      |
| <i>pre-mRNA</i> <sup>a</sup> | <i>ELP3</i>   |        | <i>Histone acetylation</i> | <i>ALS</i>                 |           |
| pre-mRNA                     | ATXN7         | 607640 | GCN5/TFTC/STAGA            | SCA7                       | (27)      |
| <b>Elongation</b>            |               |        |                            |                            |           |
| pre-mRNA                     | IKAP          | 603722 | RNA polymerase II          | FD                         | (26)      |
| pre-mRNA                     | ELP2          |        | RNA polymerase II          |                            |           |
| <i>pre-mRNA</i> <sup>a</sup> | <i>ELP3</i>   |        | <i>RNA polymerase II</i>   | <i>ALS</i>                 |           |
| pre-mRNA                     | ELP4, 5 and 6 | 606985 | RNA polymerase II          | Aniridia                   |           |
| <b>Termination</b>           |               |        |                            |                            |           |
| <b>Splicing</b>              |               |        |                            |                            |           |
| pre-mRNA                     | UNRIP         | 605986 | Spliceosome                |                            |           |
| mRNA                         | HSP73         | 600816 | Protection from RNase      |                            |           |
| pre-mRNA                     | SMN           | 600354 | Spliceosome                | SMA                        | (46)      |
| pre-mRNA                     | Gemin2-8      | 602595 | Spliceosome                |                            |           |
| pre-mRNA                     | TDP43         | 605078 |                            | ALS                        | (2, 47)   |

|                          |             |        |                       |             |      |
|--------------------------|-------------|--------|-----------------------|-------------|------|
| <b>Translation</b>       |             |        |                       |             |      |
| <i>tRNA</i> <sup>a</sup> | <i>ELP3</i> |        | <i>tRNA synthesis</i> | <i>ALS</i>  |      |
| tRNA                     | GARS        | 600287 | tRNA synthesis        | CMT2D, HMN5 | (48) |
| RNA                      | ANG         | 105850 | RNase                 | ALS         | (25) |

<sup>a</sup>The three known functions of ELP3 are shown in italics. <sup>b</sup>SMARD, SMA with respiratory distress; CMT, Charcot-Marie-Tooth disease; HMN, Hereditary motor neuronopathy; SCA, spinocerebellar ataxia FD, familial dysautonomia; SMA, spinal muscular atrophy.
